# Supplementary material for: Exposure to Cumulus Cell Secretome Improves Sperm Function: New Perspectives for Sperm Selection <em>In Vitro</em>
Source: Preprints.org preprint supplement (doi:10.20944/preprints202308.2205.v1), 2023-09-01
Supplement: Supplementary file 1 [file supplementary]

**Supplementary Materials**

**SupplementaryTable S1:** List of antibodies used in this study

| Antigen | Donor Species | Dilution | | Manufacturer | RRID |
| --- | --- | --- | --- | --- | --- |
| IF | WB |
| ***Primary antibodies*** | | | | | |
| P-Tyr | Mouse | 1:50 | 1:250 | Santa Cruz Biotechnology | AB_628123 |
| Tubulin | Mouse | - | 1:1000 | Sigma Aldrich | AB_628123 |
| ***Secondary antibodies*** | | | | | |
| Anti-Mouse IgM FITC | Goat | 1:400 | - | Sigma Life Science | AB_259799 |
| Anti-Mouse-IgG HRP | Goat | - | 1:2000 | Bio-Rad Laboratories | AB_609692 |

**Supplementary Table S2:** List of patients' (n=27) characteristics and seminal values.

| **Parameters** | **Average** | **Range** |
| --- | --- | --- |
| Age (years) | 34,2 | 16-51 |
| BMI | 23,5 | 17,63-32 |
| Seminal volume (ml) | 3,1 | 1,5-7 |
| Number of spermatozoa (x106)/ml | 75,4 | 20-240 |
| Total number of spermatozoa (x106) | 208,3 | 57,6-455 |
| Motility (%) | 65 | 47-78 |
| Morphologically normal sperm (%) | 9 | 4-16 |
